# Supplementary material for: Ruthenium nanodendrites on reduced graphene oxide: an efficient water and 4-nitrophenol reduction catalyst
Source: Royal Society of Chemistry journal article supplement (doi:10.1039/d0nj05565d), 2020-12-11
Supplement: d0nj05565d1.pdf [file d0nj05565d1.pdf]

Supplementary Information

**Ruthenium nanodendrites on reduced graphene oxide:  
An efficient water and 4-nitrophenol reduction catalyst**

*Barun Kumar Barman,<sup>a</sup> Bidushi Sarkar,<sup>a</sup> Ravi Nandan<sup>a,b</sup> and Karuna Kar Nanda<sup>a,\*</sup>*

*<sup>a</sup> Materials Research Centre, Indian Institute of Science, Bangalore-560012, India*

*<sup>b</sup> (Present address) Graduate School of Advanced Science and Technology, Japan Advanced Institute of Science and Technology, Ishikawa 923-1211, Japan.*

*\*Email: [nanda@iisc.ac.in](mailto:nanda@iisc.ac.in) (Prof. K K Nanda)*

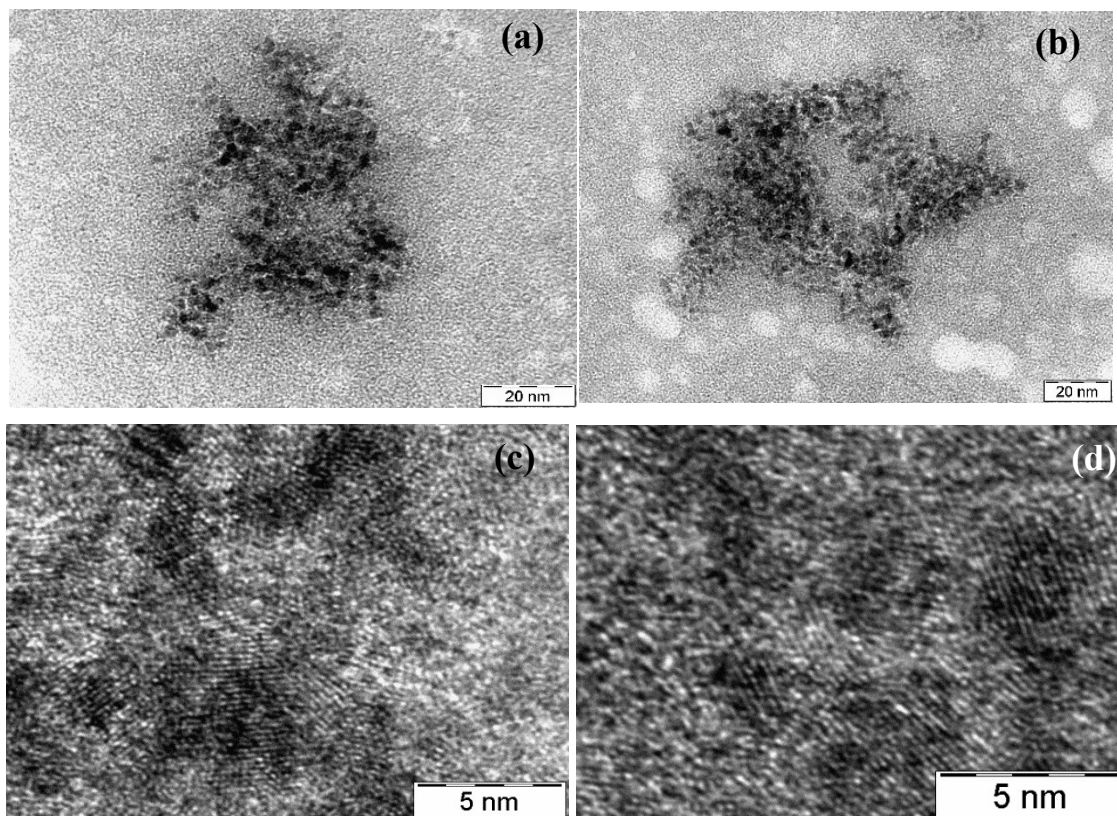

**Figure S1** (a) Schematic illustration of Ru nanostructures formation via GRR. (b and c) TEM images (d and e) HRTEM images of Ru dendritic nanostructures, respectively.

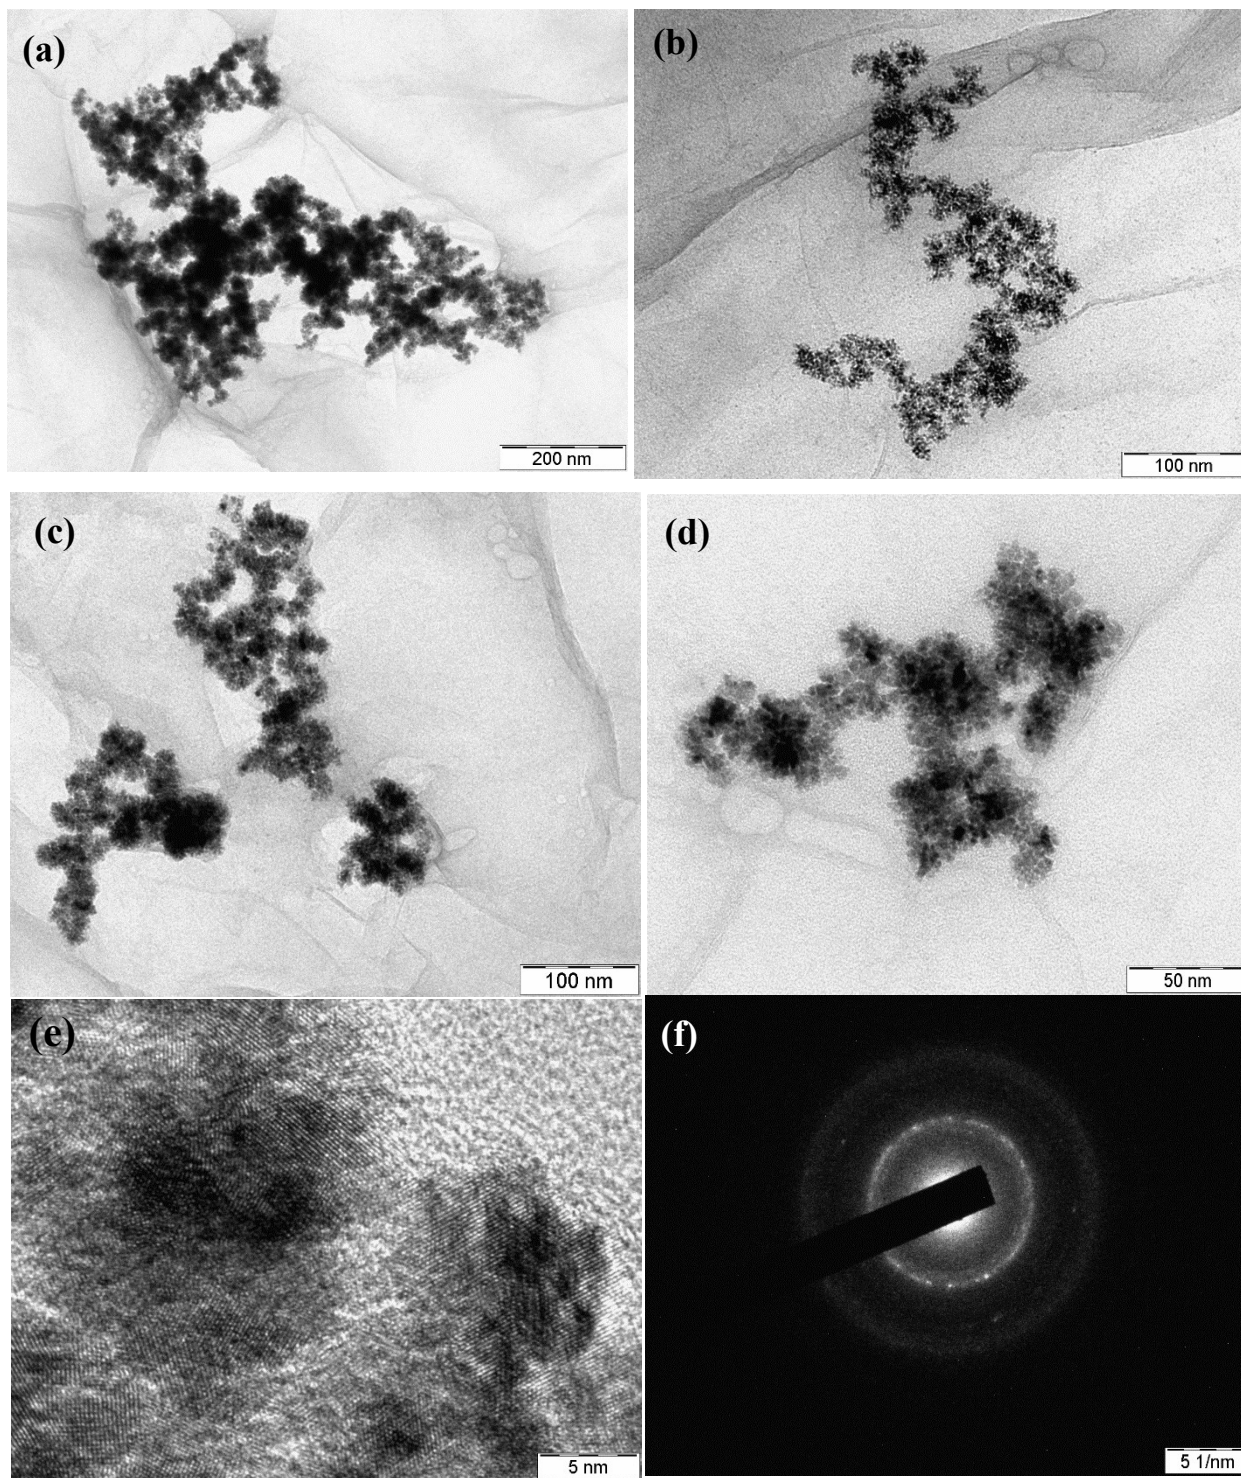

**Figure S2** (a and d) TEM images of Ru dendrites nanostructures on rGO substrate (Ru@rGO) from different position. (e and f) HRTEM images and SAED pattern of Ru@rGO.

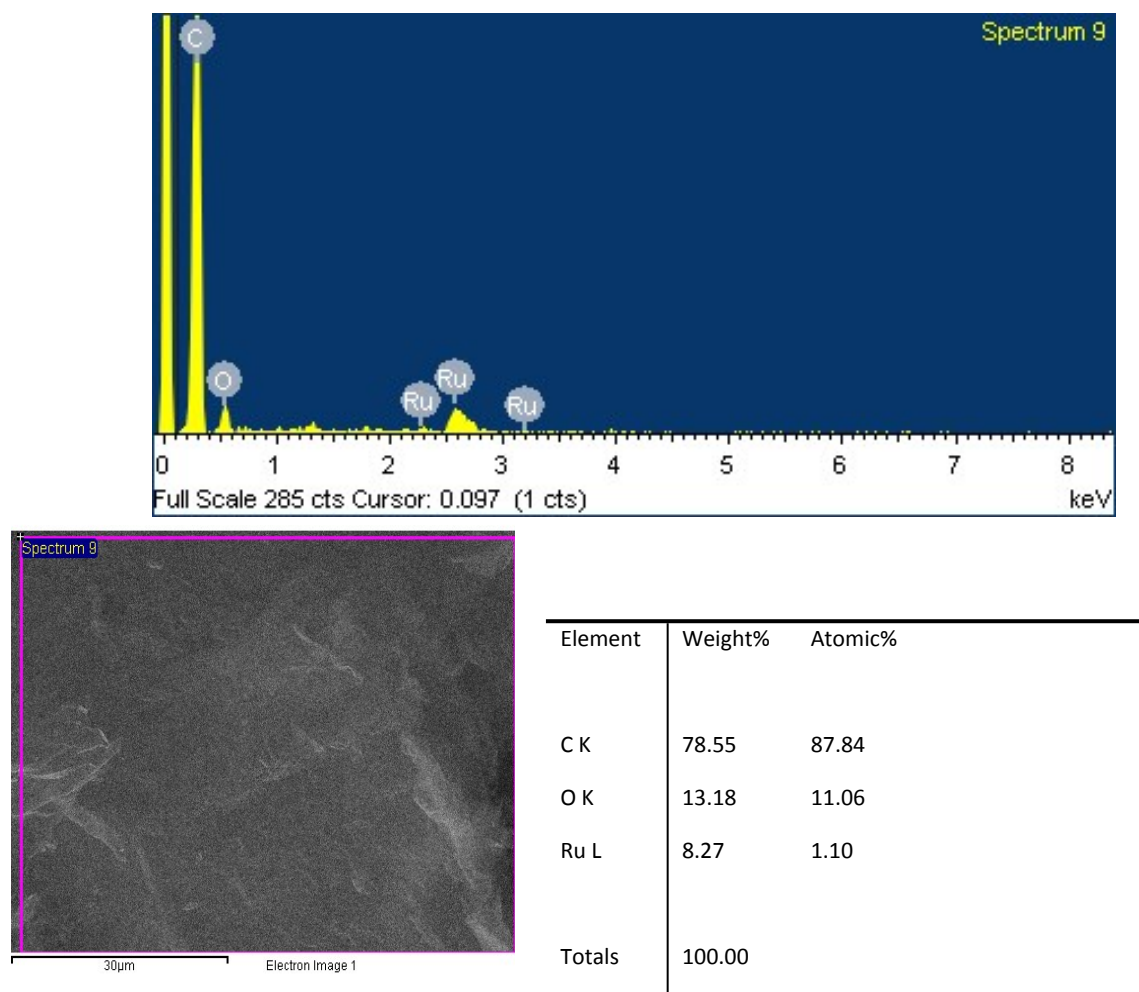

**Figure S3** EDS and SEM spectra of Ru@rGO hybrid nanostructures.

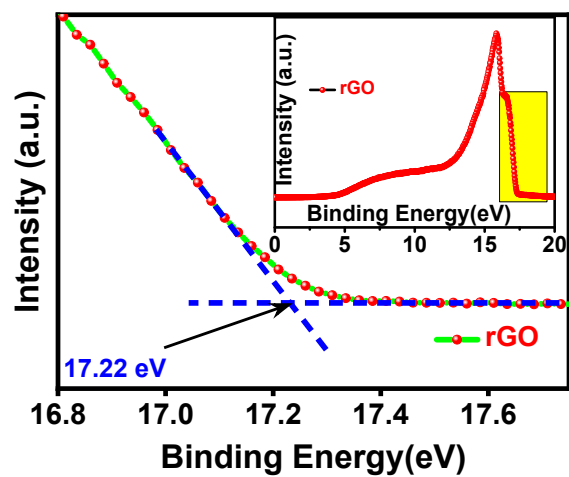

**Figure S4** UPS spectrum of rGO and the Fermi energy is found to be  $\sim 4$  eV.

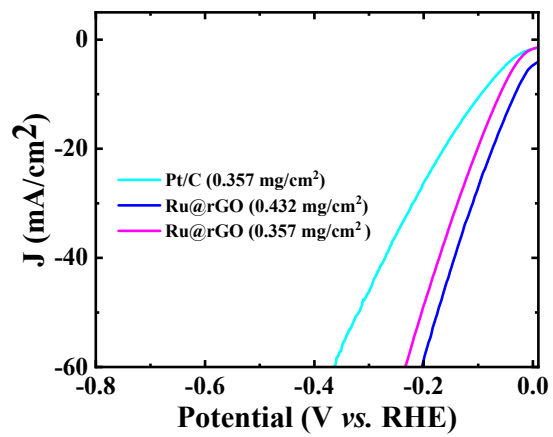

**Figure S5** HER activity of different loading of the Ru@rGO catalyst, respectively.

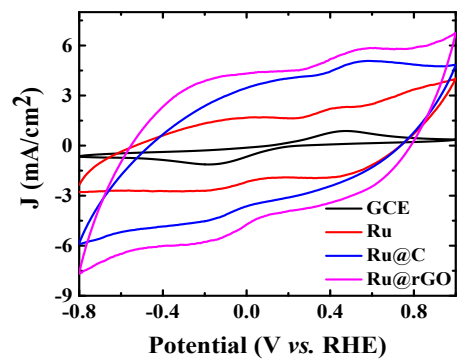

**Figure S6.** CVs run of ferrocynide containing aqueous solution using bare GCE and Ru based hybrid-modified (Ru, Ru@C and Ru@rGO) GCE in 10 mM of ferrocynide and KCl solution.

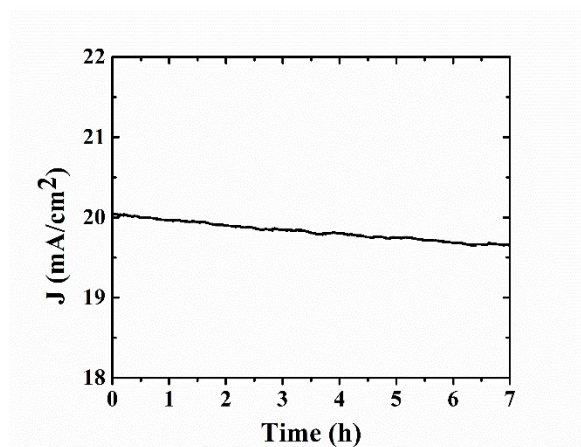

**Figure S7.** Chronoamperometry measurements in 1 M KOH solution of Ru@rGO structures.

**Table S1: Comparison of HER performance of Ru based hybrid with the reported catalyst.**

| Catalyst                            | Electrolyte | Potential ( $\eta$ ) at 10 mA/cm <sup>2</sup> current density | Ref.                                                 |
|-------------------------------------|-------------|---------------------------------------------------------------|------------------------------------------------------|
| Ru@rGO                              | 1 KOH       | 32 mV                                                         | This work                                            |
| Ru/C <sub>3</sub> N <sub>4</sub> /C | 0.1 M KOH   | 79 mV                                                         | J. Am. Chem. Soc. 2016, 138, 16174-16181             |
| Ru@C <sub>2</sub> N                 | 1 M KOH     | 17 mV                                                         | Nat. Nanotechnol, 2017, <b>12</b> , 441              |
| Ultrafine Ru/N-G                    | 1 KOH       | 44 mV                                                         | Sustainable Energy Fuels, 2017, <b>1</b> , 1028-1033 |
| RuP <sub>2</sub> @N, P doped C      | 1 M KOH     | 52 mV                                                         | Angew. Chem. Int. Ed. 10.1002/anie.201704911         |
| Ru@NC                               | 1 M KOH     | 32 mV                                                         | Energy Environ. Sci., 2018,11, 800-806               |
| Ru-MoO <sub>2</sub>                 | 1 M KOH     | 29 mV                                                         | J. Mater. Chem. A. 2017, 5, 5475                     |
| Cu <sub>2-x</sub> S@Ru              | 1 M KOH     | 82 mV                                                         | Small 2017, 13, 1700052                              |
| Ru/NC                               | 1 M KOH     | 21 mV                                                         | J. Mater. Chem. A, 2017,5, 25314-25318               |
| Pt-Ru-Mo                            | Sea water   | 196 mV                                                        | J. Mater. Chem. A. 2016, 4, 6513                     |
| PdP <sub>2</sub> @CB                | 1 M KOH     | 35.4 mV                                                       | Angew. Chem. Int. Ed., 2018, 57, 14862.              |
| Pd-Ru@NG                            | 1 M KOH     | 42 mV                                                         | Chem. Commun., 2019, 55, 13928                       |
| Ultrafine Ru/NG tube                | 1 M KOH     | 45 mV                                                         | ACS Appl. Energy Mater. 2019, 2, 10, 7330            |

**Table S2.** Comparison of 4-NP reduction by different catalysts in presence of NaBH<sub>4</sub>

| <i>Catalyst</i>             | <i>Reaction Completion time (min)</i> | <i>Rate constant, <math>k_{app}</math> (<math>min^{-1}</math>)</i> | <i>Reference</i> |
|-----------------------------|---------------------------------------|--------------------------------------------------------------------|------------------|
| <i>Ru@rGO</i>               | 9                                     | 0.53                                                               | <i>This work</i> |
| PtRh ANMPs                  | 20                                    | 0.20                                                               | 1                |
| Ru@PDC- 2 mg                | 13                                    | 0.69                                                               | 2                |
| Ru/PC-IM                    | 14                                    | 0.19                                                               | 3                |
| Pt/SiO <sub>2</sub>         | 15                                    | 0.13                                                               | 4                |
| Pd-mDR-MgO                  | 15                                    | 0.18                                                               | 5                |
| Pd-EDA- <i>f</i> -PP-g-PGMA | 10                                    | 0.18                                                               | 6                |
| Pd@Ru NSs                   | 14                                    | 0.22                                                               | 7                |
| Au/Ru-GO                    | 18                                    | -                                                                  | 8                |
| Ru NFs FCC                  | -                                     | 0.022                                                              | 9                |
| Ru-60                       | 14                                    | 0.28                                                               | 10               |

## References

1. Q. Yan, X.-Y. Wang, J.-J. Feng, L.-P. Mei and A.-J. Wang, *Journal of Colloid and Interface Science*, 2021, **582**, 701-710.
2. P. Veerakumar, K. Salamalai, P. Thanasekaran and K.-C. Lin, *ACS Omega*, 2018, **3**, 12609-12621.
3. R. Ding, Q. Chen, Q. Luo, L. Zhou, Y. Wang, Y. Zhang and G. Fan, *Green Chemistry*, 2020, **22**, 835-842.
4. A. V. Korobeinyk, R. D. L. Whitby, S. V. Mikhalovsky and V. J. Inglezakis, *Journal of Physics and Chemistry of Solids*, 2019, **127**, 28-34.
5. J. Seth, P. Dubey, V. R. Chaudhari and B. L. V. Prasad, *New Journal of Chemistry*, 2018, **42**, 402-410.
6. G. E. P. Lopez, J. F. Madrid and D. H. Camacho, *New Journal of Chemistry*, 2020, **44**, 19337-19350.
7. Z. Zhang, Y. Liu, B. Chen, Y. Gong, L. Gu, Z. Fan, N. Yang, Z. Lai, Y. Chen, J. Wang, Y. Huang, M. Sindoro, W. Niu, B. Li, Y. Zong, Y. Yang, X. Huang, F. Huo, W. Huang and H. Zhang, *Advanced Materials*, 2016, **28**, 10282-10286.
8. İ. A. Kariper, M. O. Çağlayan and Z. Üstündağ, *Research on Chemical Intermediates*, 2019, **45**, 801-813.
9. H. Ye, Q. Wang, M. Catalano, N. Lu, J. Vermeylen, M. J. Kim, Y. Liu, Y. Sun and X. Xia, *Nano Letters*, 2016, **16**, 2812-2817.
10. S. Anantharaj, M. Jayachandran and S. Kundu, *Chemical Science*, 2016, **7**, 3188-3205.
